# Supplementary material for: Histone variant H3F3A promotes lung cancer cell migration through intronic regulation
Source: PubMed Central journal article supplement (PMC5477500; doi:10.1038/ncomms12914), 2016-10-03
Supplement: ncomms12914-s1.pdf [file ncomms12914-s1.pdf]

## Supplementary Figures

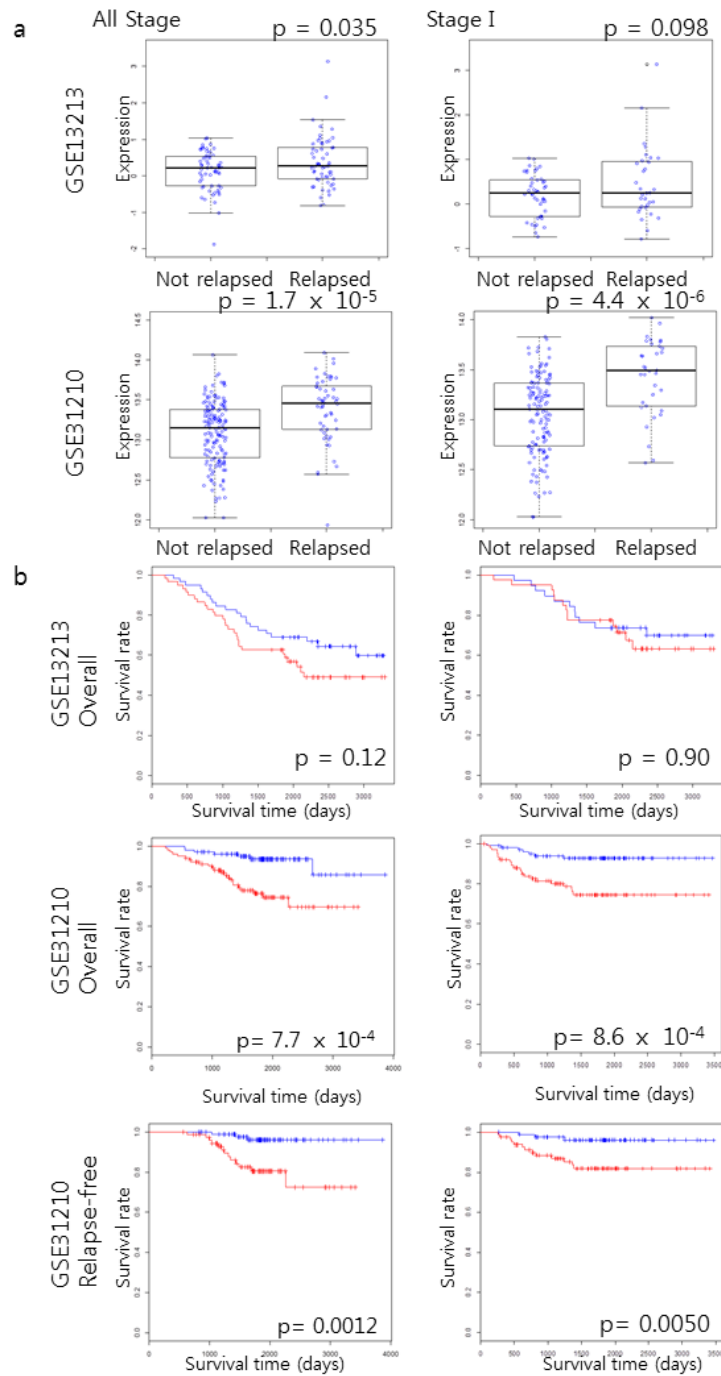

**Supplementary Figure 1.** H3F3B expression in lung cancer. a. Comparison of *H3F3B* expression in relapsed and non-relapsed lung cancer patients. b. Prognosis of two groups of lung cancer patients classified by *H3F3B* expression. (Red: high expression group, Blue: low expression group).

GSE13213 Stage I  
HIST1H3A  
p = 0.09829

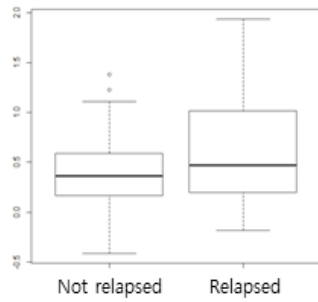

HIST1H3B  
p = 0.09803

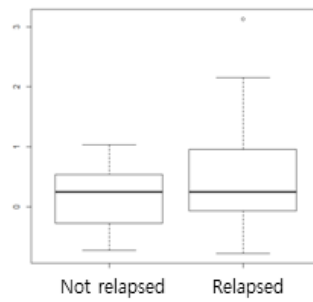

HIST1H3C  
p = 0.228

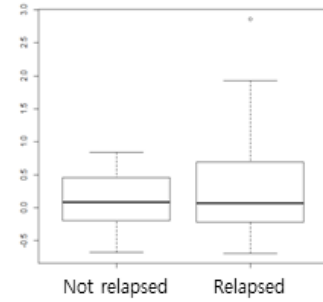

HIST1H3D  
p = 0.2357

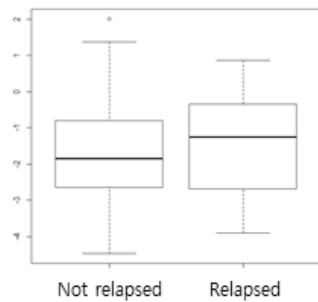

HIST1H3E  
p = 0.08309

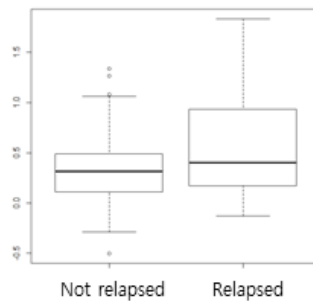

HIST1H3F  
p = 0.08493

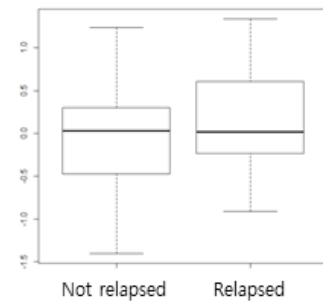

HIST1H3G  
p = 0.305

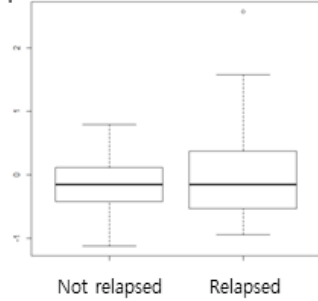

HIST1H3H  
p = 0.09922

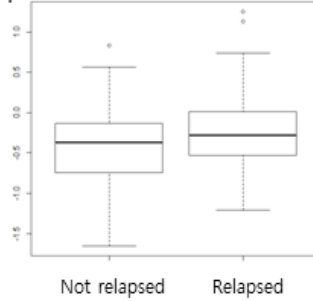

HIST1H3J  
p = 0.1853

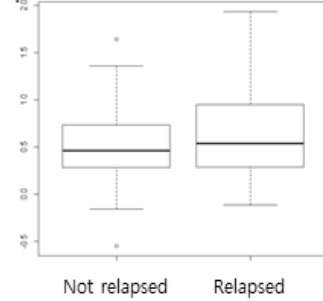

HIST2H3A  
p = 0.1765

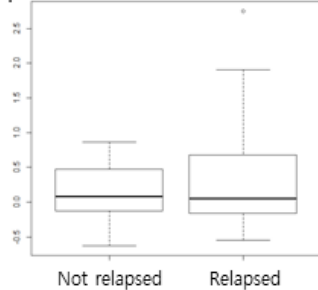

**Supplementary Figure 2.** Comparison of canonical histone expression in relapsed and non-relapsed lung cancer patients

GSE13213 Stage I  
HIST1H3A

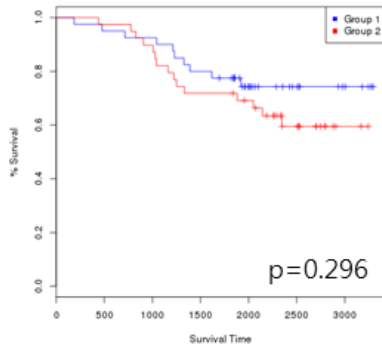

HIST1H3B

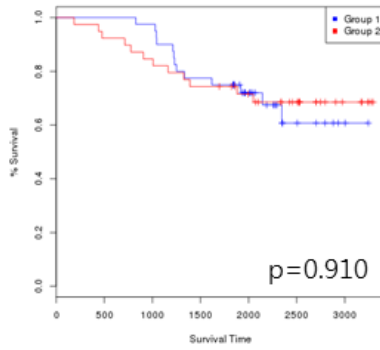

HIST1H3C

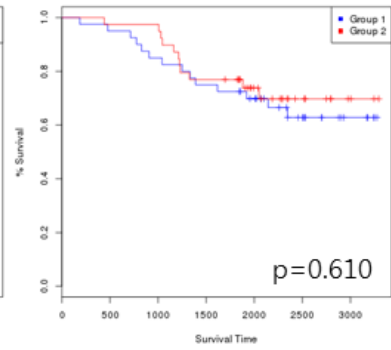

HIST1H3D

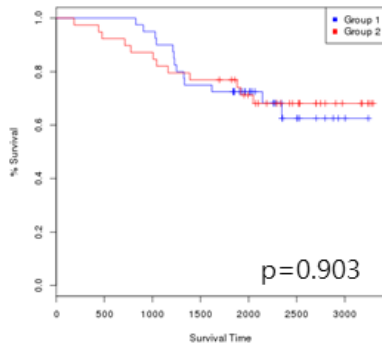

HIST1H3E

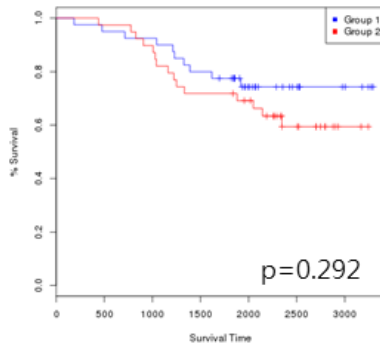

HIST1H3F

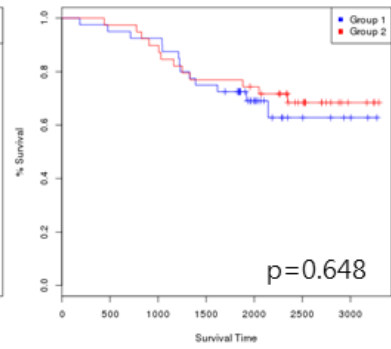

HIST1H3G

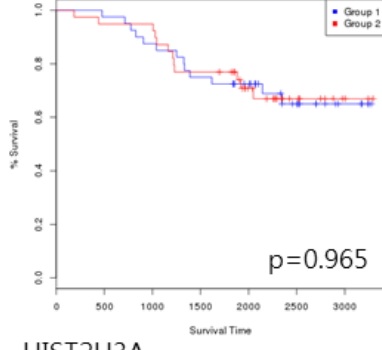

HIST1H3H

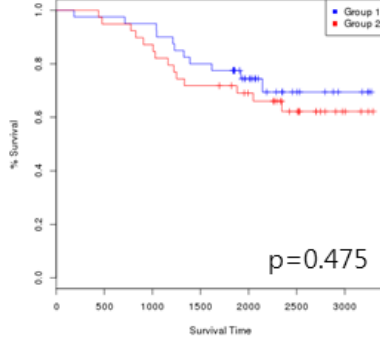

HIST1H3J

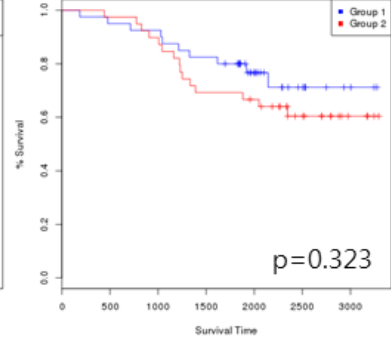

HIST2H3A

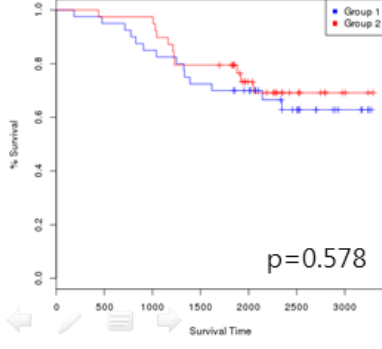

**Supplementary Figure 3.** Prognosis of two groups of lung cancer patients classified by canonical histone expression. (Red: high expression group, Blue: low expression group)

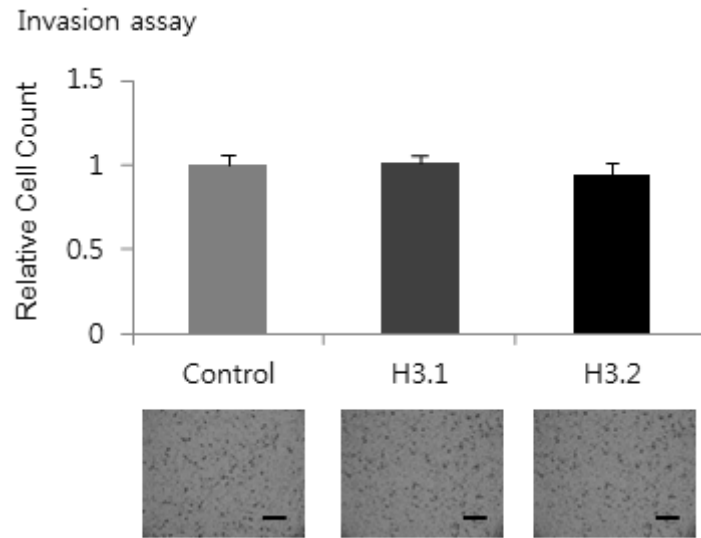

**Supplementary Figure 4.** The results of invasion assays using canonical histone H3-overexpressing A549 cells. Scale bar, 200 $\mu$ m.

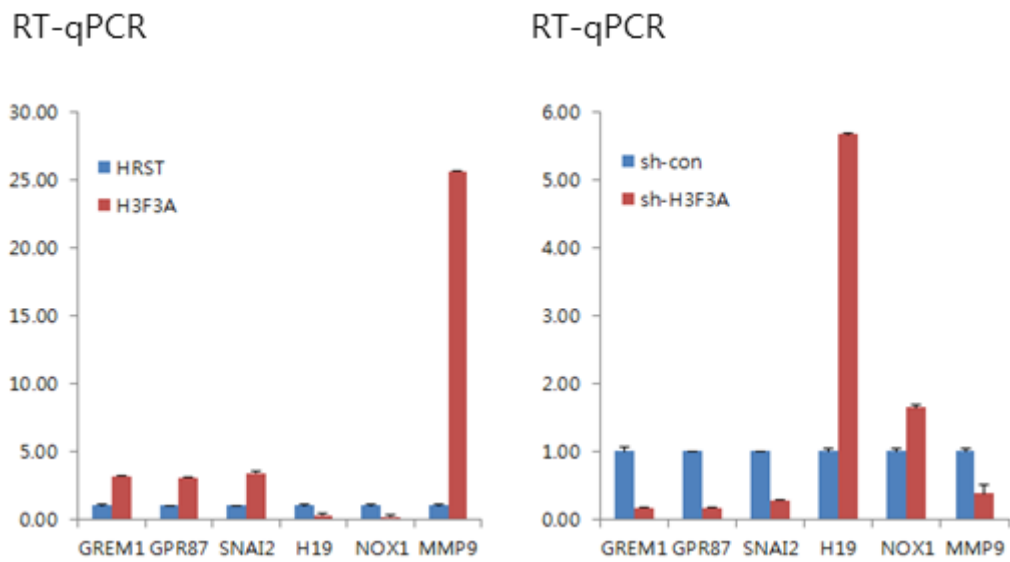

**Supplementary Figure 5.** Validation of DEGs using RT-qPCR.

### Venn analysis

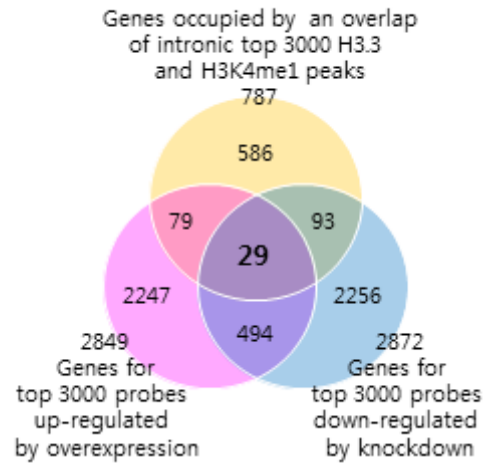

**Supplementary Figure 6.** Venn analysis using H3.3 ChIP-seq and microarray data.

### Invasion assay

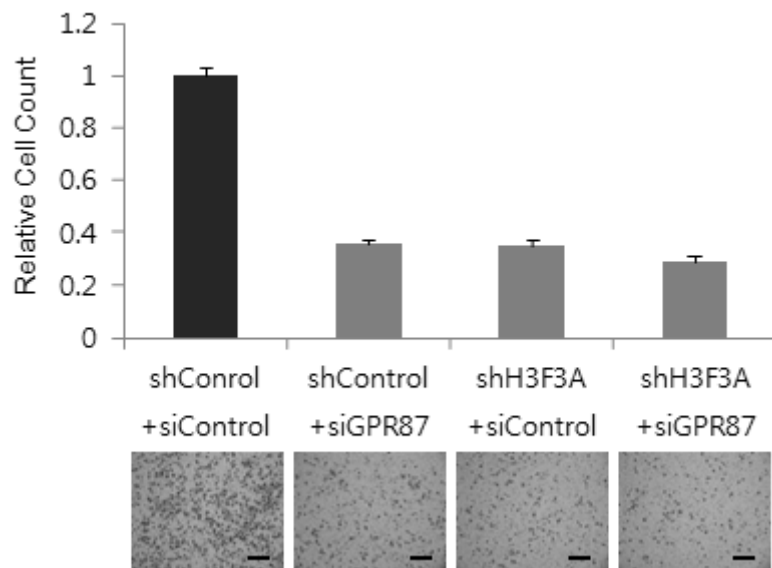

**Supplementary Figure 7.** The results of invasion assays after H3.3/GPR87 single and double knockdown. Scale bar, 200µm.

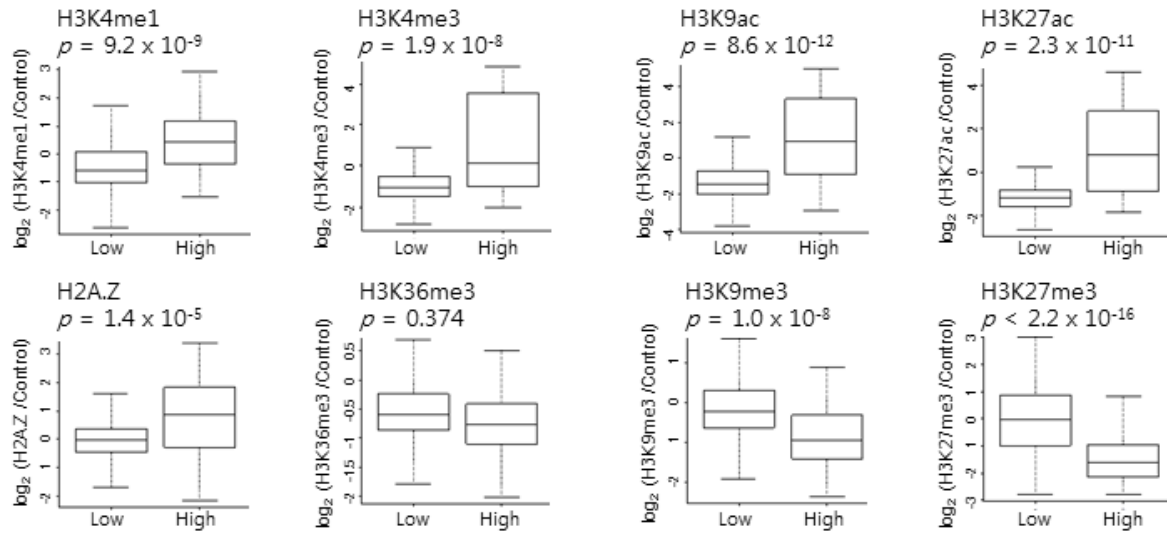

**Supplementary Figure 8.** Comparison of histone marks on H3.3 peaks between low turnover and high turnover peaks defined by SRA043915 dataset (Huang et al. 2013).

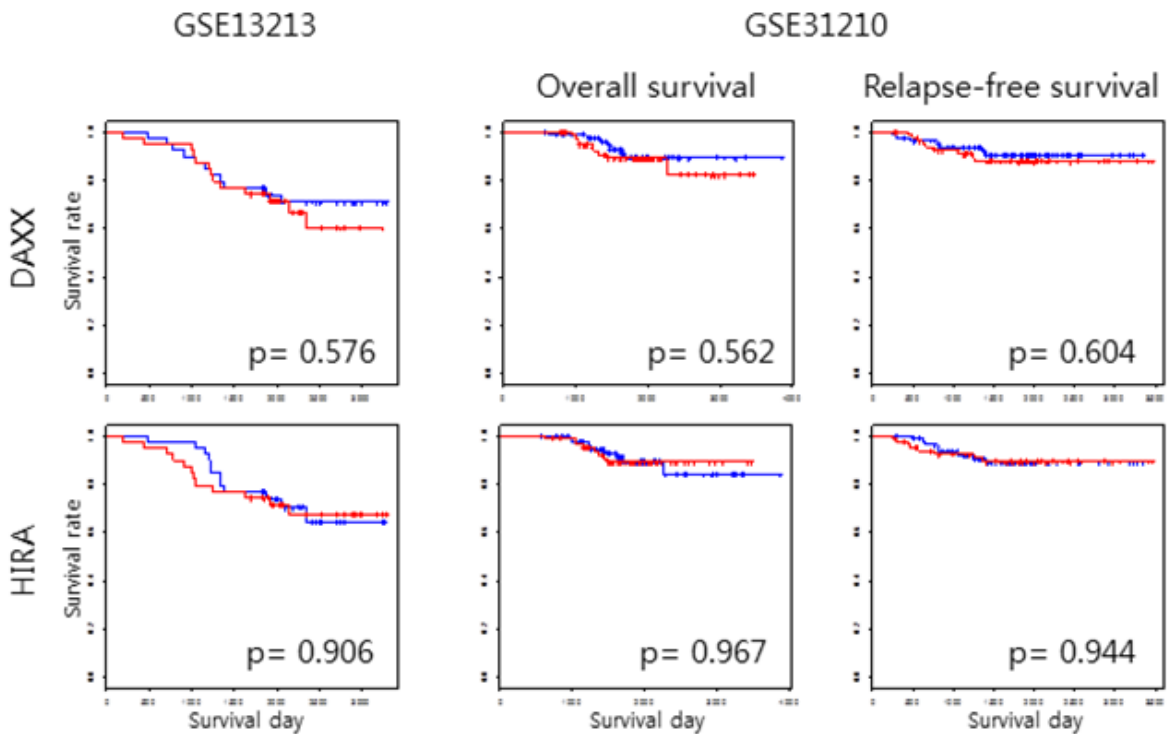

**Supplementary Figure 9.** Prognosis of two groups of lung cancer patients classified by *DAXX* and *HIRA* expression. (Red: high expression group, Blue: low expression group).

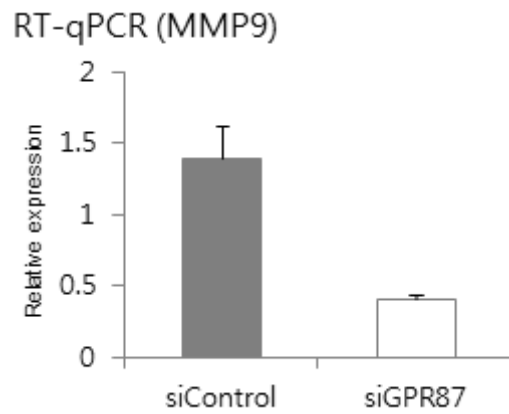

**Supplementary Figure 10.** Measuring MMP9 expression after GPR87 knockdown using RT-qPCR assay. Scale bar, 200 $\mu$ m.

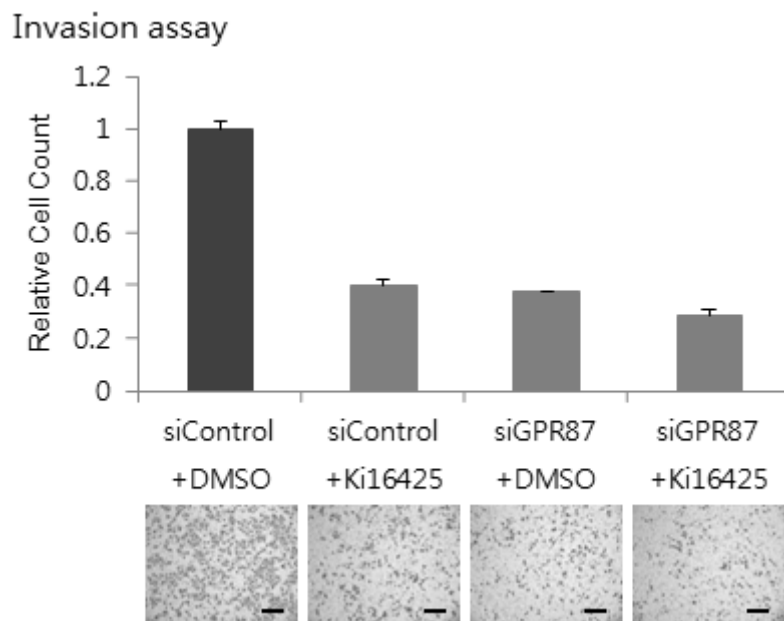

**Supplementary Figure 11.** The results of invasion assays after GPR87 knockdown and/or Ki16425 treatment. Scale bar, 200 $\mu$ m.

Figure 1a and c Immunoblot

A549

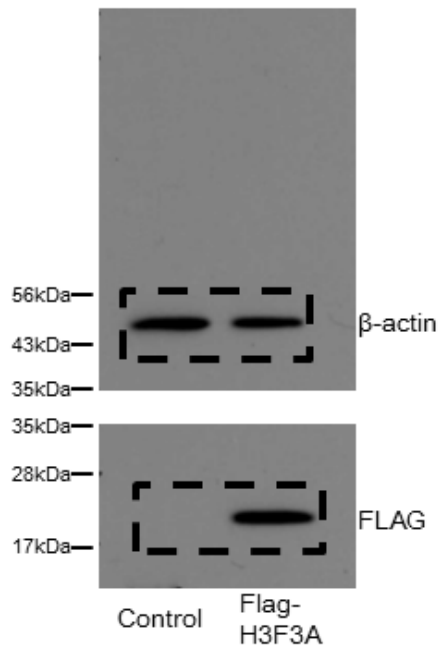

NCI-H23

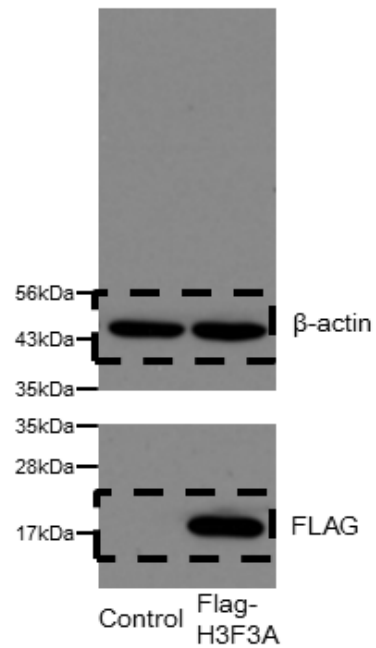

Figure 1b and d RT-PCR

A549

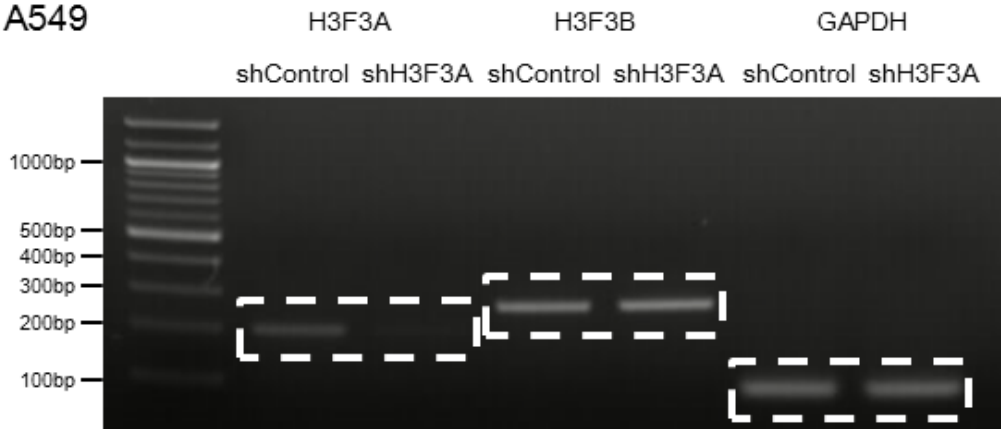

NCI-H23

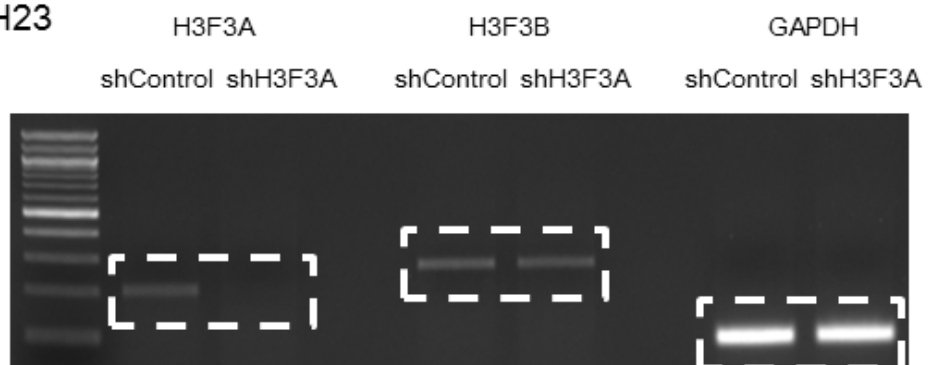



Figure 3c RT-PCR

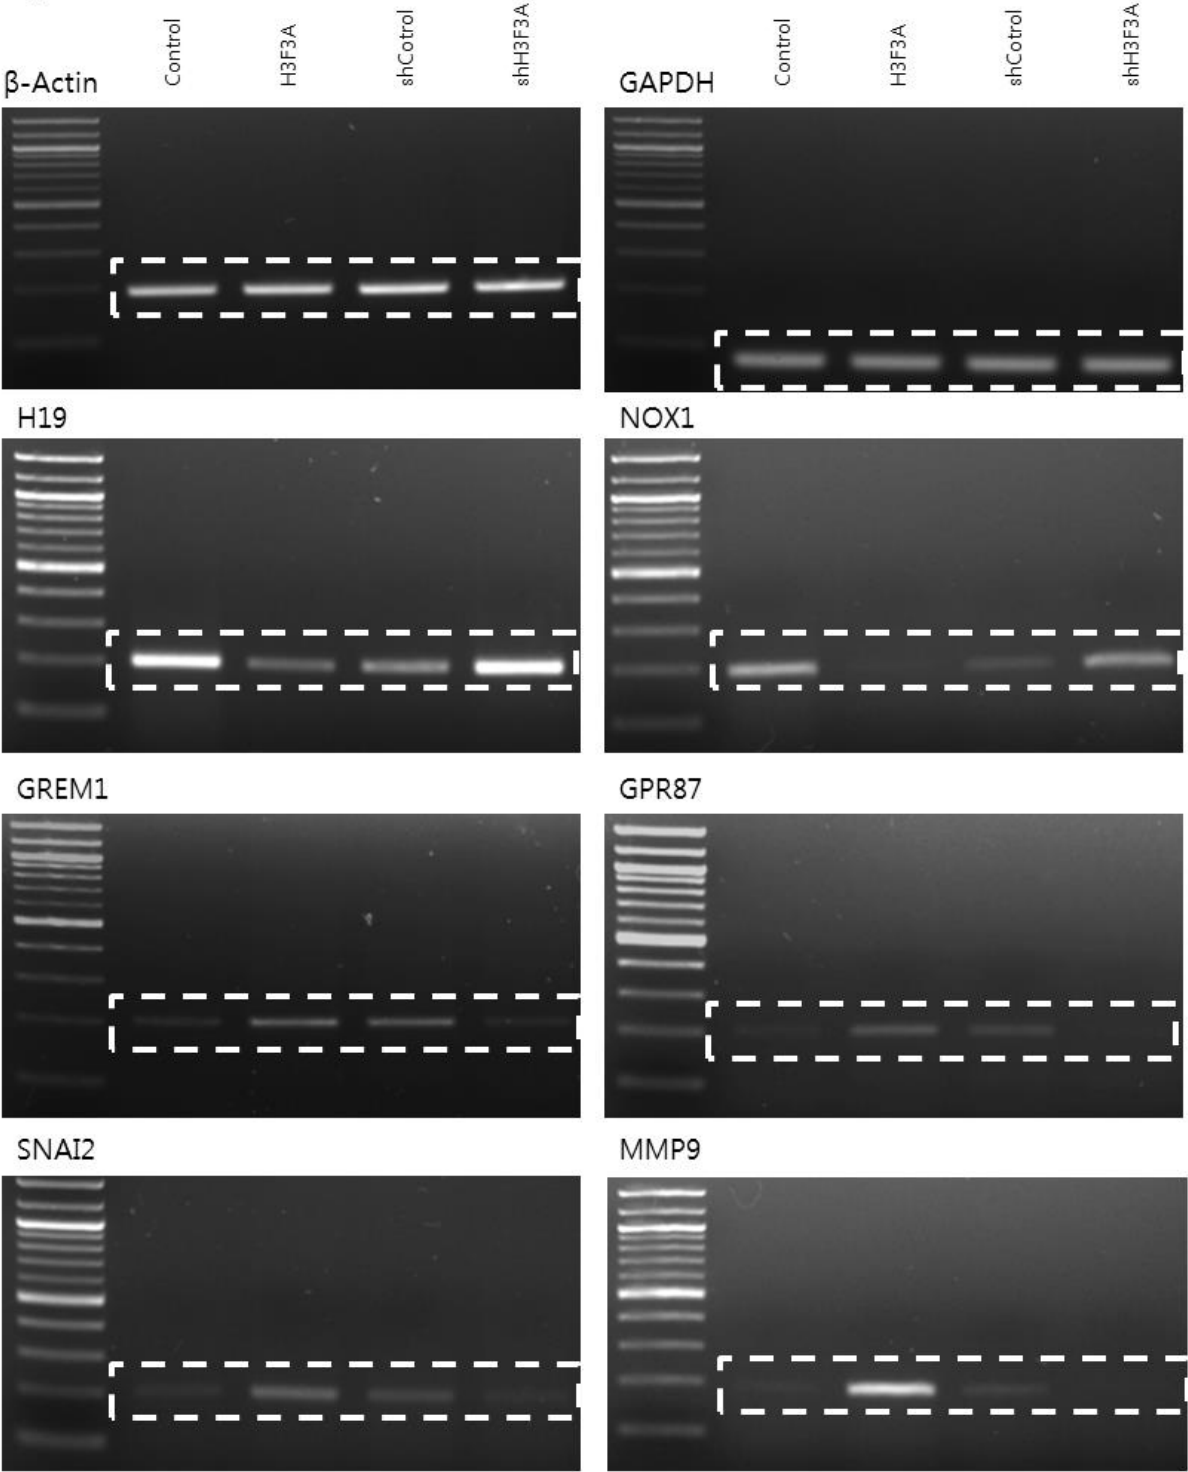

Figure 5c CHIP-PCR

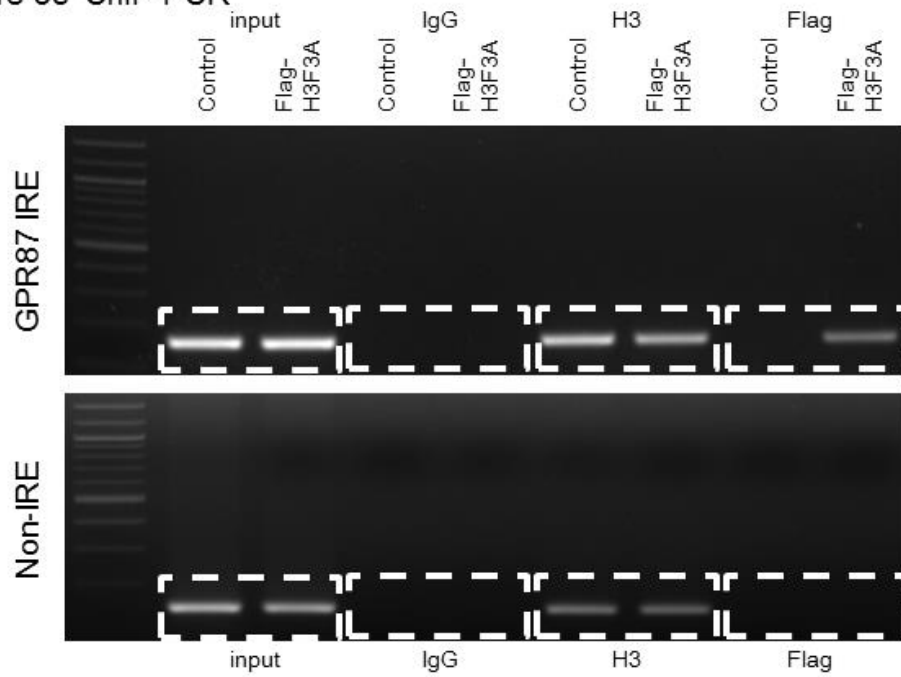

Figure 6e 3C PCR

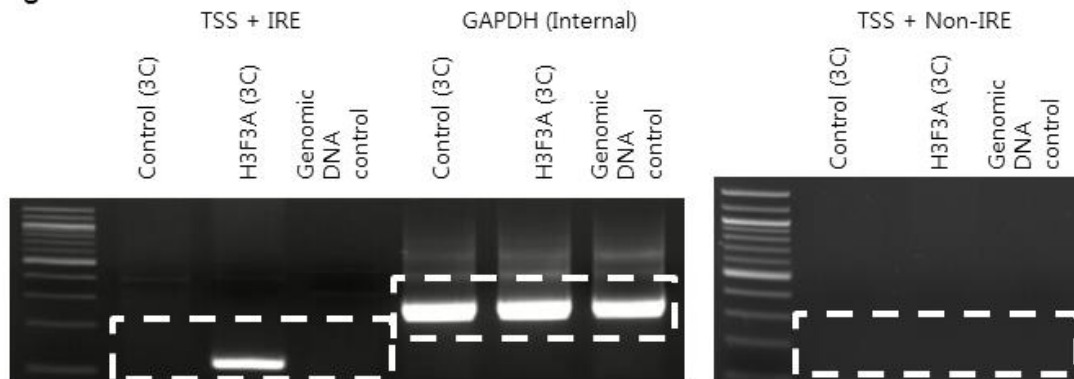

Figure 7C RT-PCR

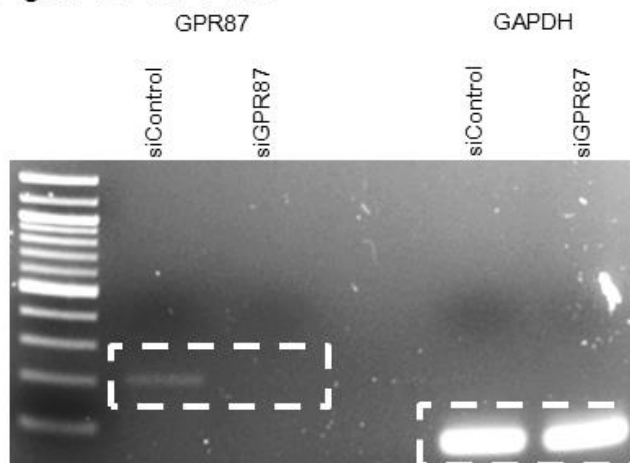

Supplementary Figure 12. Uncropped scans of the blots and gel images

## Supplementary Tables

Supplementary Table 1. Result of log-rank test between the patients in each group and out of the group. The groups were divided by *H3F3A* and *GPR87* expression level.

| Group                  | p by log-rank test (In group vs. out of group) |                 |
|------------------------|------------------------------------------------|-----------------|
|                        | GSE13213                                       | GSE31210        |
| H3F3A_low, GPR87_low   | <b>0.002030</b>                                | <b>0.016900</b> |
| H3F3A_low, GPR87_high  | 0.332000                                       | 0.152000        |
| H3F3A_high, GPR87_low  | 0.938000                                       | 0.923000        |
| H3F3A_high, GPR87_high | <b>0.013900</b>                                | <b>0.000009</b> |

Supplementary Table 2. Sequences of shRNAs and siRNAs used in this study

| Name        | sequence                                                                        |
|-------------|---------------------------------------------------------------------------------|
| shControl-F | TGC CTA CGC CAC CAA TTT CGT TTC AAG AGA ACG AAA TTG GTG GCG TAG GTT TTT TC      |
| shControl-R | TCG AGA AAA AAC CTA CGC CAC CAA TTT CGT TTC AAG AGA ACG AAA TTG GTG GCG TAG GCA |
| shH3F3A-F   | TGT GAA GAA ACC TCA TCG TTA TTC AAG AGA TAA CGA TGA GGT TTC TTC ATT TTT TC      |
| shH3F3A-R   | TCG AGA AAA AAT GAA GAA ACC TCA TCG TTA TTC AAG AGA TAA CGA TGA GGT TTC TTC ACA |
| siControl-F | CCU ACG CCA CCA AUU UCG U(dTdT)                                                 |
| siControl-R | ACG AAA UUG GUG GCG UAG G(dTdT)                                                 |
| siGPR87-F   | GAC CUU AGU UUC AAA GCU U(dTdT)                                                 |
| siGPR87-R   | AAG CUU UGA AAC UAA GGU C(dTdT)                                                 |
| siHIRA-F    | CUG ACA AGC AGG ACU CAC U(dTdT)                                                 |
| siHIRA-R    | AGU GAG UCC UGC UUG UCA G(dTdT)                                                 |
| siDAXX-F    | CUG AUA CCU UCC CUG ACU A(dTdT)                                                 |
| siDAXX-R    | UAG UCA GGG AAG GUA UCA G(dTdT)                                                 |

Supplementary Table 3. Sequences of primers used in this study

| Name                                                  | sequence                          |
|-------------------------------------------------------|-----------------------------------|
| <b>RT-PCR and RT-qPCR</b>                             |                                   |
| H3F3A_F                                               | GGC TCG TAC AAA GCA GAC TGC C     |
| H3F3A_R                                               | GGA AGT TTG CGA ATC AGA AG        |
| H3F3B_F                                               | CCA AGC AGA CTG CTC GTA AGT C     |
| H3F3B_R                                               | CGA TGG CTG CGC TCT GAA ACC       |
| GPR87_F                                               | GGG GAG ATG TTT CGT TTT CA        |
| GPR87_R                                               | AAC ACT TGG GGA CGA TTG AG        |
| MMP9_F                                                | CTC GAA CTT TGA CAG CGA CA        |
| MMP9_R                                                | GCC ATT CAC GTC GTC CTT AT        |
| $\beta$ -Actin_F                                      | TCC CTG GAG AAG AGC TAC GA        |
| $\beta$ -Actin_R                                      | AGC ACT GTG TTG GCG TAC AG        |
| GAPDH_F                                               | TCC TGC ACC ACC AAC TGC TTA G     |
| GAPDH_R                                               | TGG TCA TGA GTC CTT CCA CGA TAC   |
| <b>ChIP PCR and ChIP qPCR</b>                         |                                   |
| GPR87_IRE_F                                           | CCT GGA ACC AAG CCC TTT AC        |
| GPR87_IRE_R                                           | ACC TGC CTG CTG TCT TTC TG        |
| Non_IRE_F                                             | CCA CAA AAA TGC AGG AAC TAC A     |
| Non_IRE_R                                             | TCC TCC ACT CTC CAG TTT TCC       |
| GPR87 proximal promoter<br>(-113 ~ +36 bp from TSS) F | GCG ACT ACT GGA ACA ACT TGC       |
| GPR87 proximal promoter<br>(-113 ~ +36 bp from TSS) R | CTA AGC TCC AGC CCT CTG TG        |
| GPR87 distal promoter<br>(-898 ~ -733 bp from TSS) F  | GGT AGG ATT ACA GGT GCC CAC GAC T |
| GPR87 distal promoter<br>(-898 ~ -733 bp from TSS) R  | CGG GCG CAG TGG CTC ACA CA        |
| <b>3C PCR</b>                                         |                                   |
| TSS                                                   | CGT GGG CAC CTG TAA TCC TAC       |
| IRE                                                   | GCC ATC TCA GCA TAA ACA AGG       |
| Non-IRE                                               | TCA GAT GGC TTT TGT GAA GAC       |
| GAPDH (internal) F                                    | ACA GTC CAT GCC ATC ACT GCC       |
| GAPDH (internal) R                                    | GCC TGC TTC ACC ACC TTC TTG       |

Supplementary Table 4. Antibodies used in this study

| Antigen           | Company        | Catalog # | Description                                                           |
|-------------------|----------------|-----------|-----------------------------------------------------------------------|
| Flag              | Sigma          | F1804     | Monoclonal ANTI-FLAG M2 antibody                                      |
| $\beta$ -actin    | Cell Signaling | 5125s     | $\beta$ -Actin (13E5) Rabbit mAb (HRP Conjugate)                      |
| IgG               | Cell Signaling | 12-370    | Polyclonal Rabbit anti-IgG antibody                                   |
| H3                | Abcam          | ab1791    | Anti-Histone H3 antibody                                              |
| H2A.Z             | Millipore      | 07-594    | Anti-Histone H2A.Z Antibody                                           |
| H3K4me1           | Abcam          | ab8895    | Anti-Histone H3 (mono methyl K4) antibody                             |
| H3K9ac            | Abcam          | ab4441    | Anti-Histone H3 (acetyl K9) antibody                                  |
| Pol II            | BioLegend      | 920101    | Anti-RNA Polymerase II                                                |
| Pol II phospho S5 | Abcam          | ab5408    | Anti-RNA polymerase II CTD repeat YSPTSPS (phospho S5) antibody [4H8] |
